# Supplementary material
Source: Research Square preprint supplement (doi:10.21203/rs.3.rs-9248949/v1)
Supplement: Supplementary file 1 [file 32dae3097c94875aa02c5b79.pdf]

## STROBE Checklist – Cross-Sectional Study

**For: "Clinical and radiological presentations of pulmonary hydatid cysts in Yemen: a retrospective cross-sectional study at a tertiary center"**

| Item                        | Recommendation                                                                   | Manuscript Location                                                       | Compliance     |
|-----------------------------|----------------------------------------------------------------------------------|---------------------------------------------------------------------------|----------------|
| <b>TITLE &amp; ABSTRACT</b> |                                                                                  |                                                                           |                |
| 1                           | (a) Indicate the study's design with commonly used term in the title or abstract | Title: "a retrospective cross-sectional study"                            | ✓<br>Compliant |
|                             | (b) Provide informative and balanced summary of what was done and found          | Abstract covers Background/Methods/Results/Conclusions                    | ✓<br>Compliant |
| <b>INTRODUCTION</b>         |                                                                                  |                                                                           |                |
| 2                           | Explain scientific background and rationale                                      | Background section (lines 48-72)                                          | ✓<br>Compliant |
| 3                           | State specific objectives, including any prespecified hypotheses                 | Lines 71-72: "This study aimed to evaluate..." with 4 specific objectives | ✓<br>Compliant |
| <b>METHODS</b>              |                                                                                  |                                                                           |                |
| 4                           | Present key elements of study design early in the paper                          | Line 74: "retrospective descriptive cross-sectional study"                | ✓<br>Compliant |
| 5                           | Describe setting, locations, and relevant dates                                  | Lines 74-82: TMGH, Sana'a, Yemen; Jan 2019-Mar 2023                       | ✓<br>Compliant |
| 6                           | (a) Give eligibility criteria                                                    | Lines 83-94: 3 inclusion, 5 exclusion criteria listed                     | ✓<br>Compliant |
|                             | (b) Give sources and methods of selection of participants                        | Lines 95-99: Hospital database, consecutive sampling                      | ✓<br>Compliant |
| 7                           | Clearly define all outcomes, exposures,                                          | Lines 119-126: Variables section with categories defined                  | ✓<br>Compliant |

|                |                                                                                          |                                                                               |                |
|----------------|------------------------------------------------------------------------------------------|-------------------------------------------------------------------------------|----------------|
|                | predictors, potential confounders, and effect modifiers                                  |                                                                               |                |
| 8              | For each variable of interest, give sources of data and details of methods of assessment | Lines 100-118: Structured questionnaire, medical records, telephone follow-up | ✓<br>Compliant |
| 9              | Describe any efforts to address potential sources of bias                                | <b>Lines 113-118: Bias mitigation statement</b>                               | ✓<br>Compliant |
| 10             | Explain how study size was arrived at                                                    | Lines 95-99: 140 identified → 26 excluded → 114 analyzed                      | ✓<br>Compliant |
| 11             | (a) Describe all statistical methods                                                     | Lines 127-146: SPSS v28, Wilson score CI, Chi-square                          | ✓<br>Compliant |
|                | (b) Describe any methods used to examine subgroups and interactions                      | Multiple-response analysis mentioned (line 144)                               | ✓<br>Compliant |
|                | (c) Explain how missing data were addressed                                              | Line 118: "only records with complete data were included"                     | ✓<br>Compliant |
|                | (d) Describe any sensitivity analyses                                                    | Not applicable (descriptive study)                                            | N/A            |
| <b>RESULTS</b> |                                                                                          |                                                                               |                |
| 12             | (a) Give characteristics of study participants                                           | Table 1 (lines 147-158)                                                       | ✓<br>Compliant |
|                | (b) Give number of participants with missing data for each variable                      | Line 118: only complete data included                                         | ✓<br>Compliant |
| 13             | Report numbers of outcome events or summary measures                                     | Tables 2-5 with frequencies, percentages, 95% CI                              | ✓<br>Compliant |
| 14             | (a) Give unadjusted estimates and, if applicable, confounder-adjusted estimates          | Descriptive statistics presented; no confounder adjustment                    | N/A            |

|                          |                                                                                          |                                                        |                |
|--------------------------|------------------------------------------------------------------------------------------|--------------------------------------------------------|----------------|
|                          | (b) Report category boundaries when continuous variables were categorized                | Age groups, cyst size categories defined (Tables 1, 3) | ✓<br>Compliant |
|                          | (c) Translate estimates of relative risk into absolute risk for a meaningful time period | Not applicable                                         | N/A            |
| 15                       | Report other analyses done                                                               | Multiple-response analysis mentioned (line 144)        | ✓<br>Compliant |
| <b>DISCUSSION</b>        |                                                                                          |                                                        |                |
| 16                       | (a) Summarize key results with reference to study objectives                             | Opening paragraph summarizes findings vs. objectives   | ✓<br>Compliant |
|                          | (b) Discuss limitations of the study                                                     | Dedicated Limitations section (lines 304-307)          | ✓<br>Compliant |
|                          | (c) Give a cautious overall interpretation of results                                    | Discussion compares findings to literature             | ✓<br>Compliant |
|                          | (d) Discuss generalizability (external validity)                                         | Single-center limitation noted (lines 304-307)         | ✓<br>Compliant |
| <b>OTHER INFORMATION</b> |                                                                                          |                                                        |                |
| 17                       | Give the source of funding and the role of the funders                                   | Lines 355-357: "did not receive any specific grants"   | ✓<br>Compliant |
| 18                       | Provide references to ethical approval and informed consent                              | Lines 338-349: Ethics Committee, waiver documented     | ✓<br>Compliant |
